# Supplementary material
Source: Springer Nature journal article supplement (https://www.springerprofessional.de/resource/supplementary/13677_2012_13_MOESM7_ESM.pdf/10743464)
Supplement: MOESM7 [file 10743464]

## SAaaS Security Dashboard

Amount of events to show:

all ▾

Get Events

Status:

No events in the list of the manager agent

Events:

|     | SAaaSdemo1.research.wolke.hs-furtwangen.de |       |  |
|-----|--------------------------------------------|-------|-------------------------------------------------------------------------------------|
| No. | Date                                       | Agent | Event                                                                               |

Close

## SAaaS Security Dashboard

Amount of events to show:

all ▾

Get Events

Status:

Events successful received

Events:

|     | SAaaSdemo1.research.wolke.hs-furtwangen.de |         |  |
|-----|--------------------------------------------|---------|-------------------------------------------------------------------------------------|
| No. | Date                                       | Agent   | Event                                                                               |
| 1   | Fri, 13.January 2012 15:54:30              | inotify | Event Create on File: malicious.html                                                |

Close
